# Supplementary material for: G Protein-Coupled Receptor 37L1 Modulates Epigenetic Changes in Human Renal Proximal Tubule Cells
Source: MDPI journal article supplement (doi:10.3390/ijms232214456), 2022-11-21
Supplement: s1 [file s1]

## Supplementary material

Human Ch1 201539127 – 202592720 (GRCh38.p13)

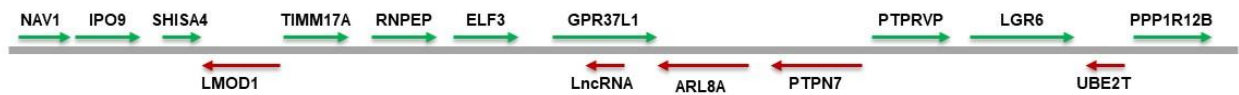

Mouse Ch1 135688350 – 134754658 (GRCm38.p6)

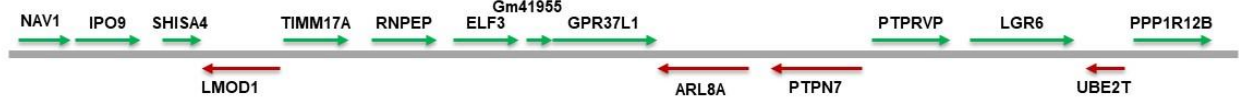

Rat Ch13 52515016 - 51583603 (Rnor\_6.0)

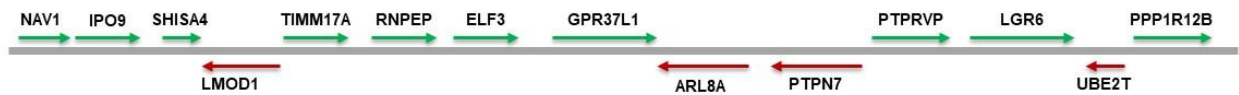

**Figure S1.** Genomic organization of the 1 MB hypertensive locus is highly similar among the rat, mouse, and human, except for LncRNA within the human GPR37L1 and a Gm41955 between ELF3 and GPR37L1 in the mouse.

**A**

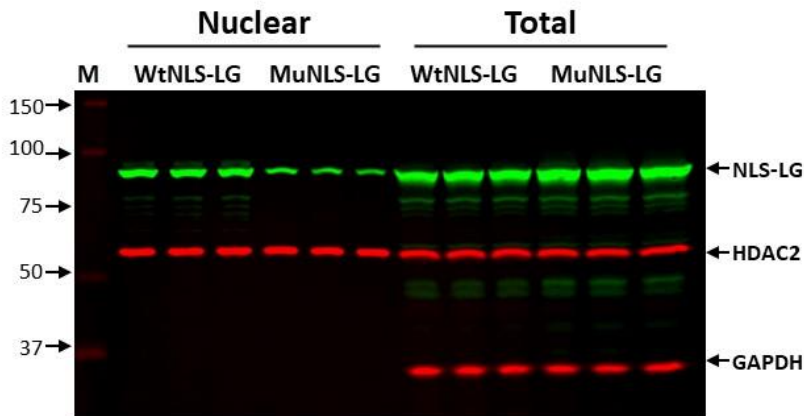

**B**

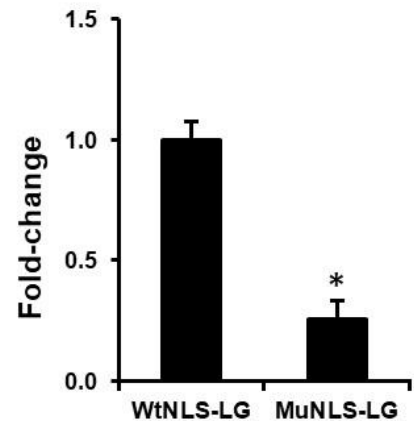

**Figure S2.** Basic amino-acid sequence RSKR in the predicted NLS is required for nuclear expression of GPR37L1. (A) hRPTCs were transfected with the wild-type NLS-LG (WtNLS-LG) or mutant NLS-LG (MuNLS-LG) plasmids. The expressions of WtNLS-LG and MuNLS-LG on nuclear or total protein preparations were determined by immunoblotting, using two-color infrared fluorescent protein detection. Wt or Mu- NLS-LG (green) were detected using the GFP antibodies. The blot was probed sequentially for HDAC2 (red), a marker for nuclear protein and GAPDH (red), a marker for cytoplasmic proteins. IRDye® 800CW-labeled donkey anti-rabbit IgG (926-32213, Licor, Lincoln, NE) was used for GPR37L1-GFP, and IRDye® 680RD-labeled donkey anti-mouse IgG (926-68022, Licor, Lincoln, NE) was used for HDAC2 and GAPDH. The molecular size markers are indicated on the left, and the Wt- or Mu- NLS-LG, HDAC2 and GAPDH proteins are indicated on the right. (B) Quantification of nuclear Wt- or Mu- NLS-LG expression was normalized to total Wt- or Mu- NLS-LG. n=3/group, \*P < 0.05 vs WtNLS-LG, t-test.
